# Supplementary material for: Transgenic Chicks Expressing Interferon-Inducible Transmembrane Protein 1 (IFITM1) Restrict Highly Pathogenic H5N1 Influenza Viruses
Source: MDPI journal article supplement (doi:10.3390/ijms22168456), 2021-08-06
Supplement: s1 [file s1]

Supplementary Table S1. Expression of innate immune genes in transgenic and non-transgenic chicken challenged with HPAI H5N1.

| Innate immune genes | Sense & Anti-sense Primers                                | Fold change                             |                                 | Significance ( <i>P value</i> )** |
|---------------------|-----------------------------------------------------------|-----------------------------------------|---------------------------------|-----------------------------------|
|                     |                                                           | Non-transgenic (Mock treated Neg. Ctrl) | Transgenic (RCASBP(A)-chIFITM1) |                                   |
| Mx                  | 5'-CACTGCAACAAGCAAAGAAGGA-3'<br>5'-TGATCAACCCCAAGGAAAA-3' | 86.0                                    | 89.0                            | NS= 0.83                          |
| IFN- $\beta$        | 5'-CCTCCAACACCTCTTCAACATG-3'<br>5'-TGGCGTGCGGTCAAT-3'     | 35.0                                    | 39.0                            | NS= 0.67                          |
| Viperin             | 5'-TGCTTAAGGAGGCGGGAATG-3'<br>5'-CAGCTGGCCTACAAATTCGC-3'  | 19.0                                    | 18.0                            | NS= 0.75                          |
| IFI35               | 5'-TGGTCCGCTATCCTCTGTCA-3'<br>5'-CTCGAGTGAGCCCAATCTCC-3'  | 33.0                                    | 37.0                            | NS= 0.83                          |
| 28S                 | 5'-GGCGAAGCCAGAGGAAACT-3'<br>5'-GACGACCGATTGACGTC-3'      | NA                                      | NA                              | NA                                |

\*Fold change represents average of triplicate repeats run on samples, compared to corresponding 28S and is rounded to full number. \*\* *P values* >0.05 were considered non-statistically significant (NS).
