# Supplementary material for: Transgenic Chicks Expressing Interferon-Inducible Transmembrane Protein 1 (IFITM1) Restrict Highly Pathogenic H5N1 Influenza Viruses
Source: MDPI journal article supplement (doi:10.3390/ijms22168456), 2021-08-06
Supplement: s1 [file s1]

Supplementary Table S2. Histopathological lesion scores for tracheas and lungs of different experimental groups.

| Histopathological lesions |                                          |  | Mock-treated (Neg. Ctrl)) | Clinical Challenge        |                    |              | Sub-lethal Challenge      |                    |              |
|---------------------------|------------------------------------------|--|---------------------------|---------------------------|--------------------|--------------|---------------------------|--------------------|--------------|
|                           |                                          |  |                           | Mock-treated (Post. Ctrl) | RCASBP(A)-chIFITM1 | RCASBP(A)-WT | Mock-treated (Post. Ctrl) | RCASBP(A)-chIFITM1 | RCASBP(A)-WT |
| <b>Trachea</b>            | Necrosis of lamina epithelialis          |  | 0.0±0.0                   | 1.4±0.5                   | 0.2±0.4            | 1.1±0.5      | 2.6±0.5                   | 0.4±0.5            | 2.4±0.5      |
|                           | Necrosis of some mucous secreting glands |  | 0.0±0.0                   | 1.6±0.5                   | 0.4±0.5            | 1.4±0.5      | 2.6±0.5                   | 0.4±0.5            | 1.8±0.4      |
|                           | Edema in lamina propria/sub mucosa       |  | 0.0±0.0                   | 2.6±0.5                   | 0.2±0.4            | 2.2±0.4      | 2.6±0.5                   | 0.4±0.5            | 2.4±0.5      |
|                           | Inflammatory cells infiltrating          |  | 0.0±0.0                   | 2.2±0.4                   | 0.0±0.0            | 2.0±0.7      | 2.6±0.5                   | 0.0±0.0            | 2.2±0.4      |
| <b>Lungs</b>              | Congestion of pulmonary blood vessels    |  | 0.0±0.0                   | 2.6±0.5                   | 0.6±0.5            | 2.2±0.4      | 3.0±0.0                   | 0.8±0.4            | 2.6±0.5      |
|                           | Inflammatory exudate                     |  | 0.0±0.0 <sup>a</sup>      | 2.0±0.0                   | 0.0±0.0            | 1.2±0.8      | 2.40±0.5                  | 0.0±0.0            | 1.8±0.8      |

Data shown as mean ± SD; one-way analysis of variance (ANOVA) were used to determine differences between groups. Statistical significance is shown with values of p< 0.05
